# Supplementary material
Source: Research Square preprint supplement (doi:10.21203/rs.3.rs-9064711/v1)
Supplement: Supplementary file 1 [file 2d881c207d6de4820c0e4862.pdf]

## Supplementary Appendix

|                                                                                                                                                                                                                                          |    |
|------------------------------------------------------------------------------------------------------------------------------------------------------------------------------------------------------------------------------------------|----|
| <b>Supplementary Results</b>                                                                                                                                                                                                             | 2  |
| <b>Supplementary Tables</b>                                                                                                                                                                                                              | 2  |
| <b>Supplementary Table 1.</b> Demographic characteristics of patients with pneumoconiosis complicated by COPD across 27 provinces in China, stratified by stage of pneumoconiosis                                                        | 2  |
| <b>Supplementary Table 2.</b> Prevalence and ORs of COPD Associated with Risk Factors and Social Determinants among Pneumoconiosis Patients in 27 Provinces of China, Stratified by Urban and Rural Residence                            | 5  |
| <b>Supplementary Table 3.</b> Collinearity Statistics                                                                                                                                                                                    | 8  |
| <b>Supplementary Table 4.</b> Multivariable-adjusted odds ratios (ORs) for COPD-related risk factors among pneumoconiosis patients in 27 provinces of China                                                                              | 9  |
| <b>Supplementary Table 5.</b> Baseline characteristics before and after 1:1 propensity score matching                                                                                                                                    | 11 |
| <b>Supplementary Figures</b>                                                                                                                                                                                                             | 14 |
| <b>Supplementary Figure 1.</b> Subgroup and interaction analyses of the association between age ( $\geq 55$ vs $< 55$ years) and COPD risk in patients with pneumoconiosis (adjusted for other covariates).                              | 14 |
| <b>Supplementary Figure 2.</b> Stratified analysis of age-related COPD risk by pneumoconiosis stage in patients with pneumoconiosis (fully adjusted model).                                                                              | 15 |
| <b>Supplementary Figure 3.</b> Stratified analysis of age-related COPD risk by geographic region in patients with pneumoconiosis (fully adjusted model).                                                                                 | 16 |
| <b>Supplementary Figure 4.</b> Stratified analysis of age-related COPD risk by BMI categories in patients with pneumoconiosis (fully adjusted model).                                                                                    | 17 |
| <b>Supplementary Figure 5.</b> Stratified analysis of age-related COPD risk by pneumoconiosis subtype in patients with pneumoconiosis (fully adjusted model).                                                                            | 17 |
| <b>Supplementary Figure 6.</b> Stratified analysis of age-related COPD risk by self-rated health (SRH) score in patients with pneumoconiosis (fully adjusted model).                                                                     | 18 |
| <b>Supplementary Figure 7.</b> Sensitivity analysis of age-related COPD risk using restricted cubic spline (RCS) models with different knot settings in patients with pneumoconiosis (fully adjusted model).                             | 18 |
| <b>Supplementary Figure 8.</b> Stratified analysis of age-related COPD risk by residence and work-related injury insurance(WRII) status in patients with pneumoconiosis after propensity score matching (adjusted for other covariates). | 19 |



|                                   |             |             |            |            |            |            |        |
|-----------------------------------|-------------|-------------|------------|------------|------------|------------|--------|
| Others                            | 833 (8.4)   | 678 (9.0)   | 104 (10.7) | 18 (2.8)   | 10 (1.6)   | 23 (12.7)  |        |
| Silicosis                         | 4760 (47.8) | 3657 (48.4) | 447 (46.2) | 252 (39.9) | 348 (55.9) | 56 (30.9)  |        |
| CWP                               | 4371 (43.9) | 3225 (42.7) | 417 (43.1) | 362 (57.3) | 265 (42.5) | 102 (56.4) |        |
| Sex                               |             |             |            |            |            |            | <0.001 |
| Male                              | 9708 (97.4) | 7383 (97.7) | 898 (92.8) | 628 (99.4) | 619 (99.4) | 180 (99.4) |        |
| Female                            | 256 (2.6)   | 177 (2.3)   | 70 (7.2)   | 4 (0.6)    | 4 (0.6)    | 1 (0.6)    |        |
| Birth place                       |             |             |            |            |            |            | <0.001 |
| Rural areas                       | 8459 (84.9) | 6565 (86.8) | 633 (65.4) | 526 (83.2) | 574 (92.1) | 161 (89.0) |        |
| Urban areas                       | 1505 (15.1) | 995 (13.2)  | 335 (34.6) | 106 (16.8) | 49 (7.9)   | 20 (11.0)  |        |
| Marital status                    |             |             |            |            |            |            | <0.001 |
| Married                           | 9198 (92.3) | 7067 (93.5) | 795 (82.1) | 594 (94)   | 578 (92.8) | 164 (90.6) |        |
| Divorced                          | 187 (1.9)   | 148 (2.0)   | 19 (2)     | 5 (0.8)    | 10 (1.6)   | 5 (2.8)    |        |
| Widowed                           | 475 (4.8)   | 262 (3.5)   | 148 (15.3) | 33 (5.2)   | 22 (3.5)   | 10 (5.5)   |        |
| Unmarried                         | 104 (1.0)   | 83 (1.1)    | 6 (0.6)    | 0 (0)      | 13 (2.1)   | 2 (1.1)    |        |
| Education level                   |             |             |            |            |            |            | <0.001 |
| Illiterate or semiilliterate      | 1041 (10.4) | 753 (10.0)  | 122 (12.6) | 91 (14.4)  | 62 (10.0)  | 13 (7.2)   |        |
| Elementary school                 | 4315 (43.3) | 3213 (42.5) | 379 (39.2) | 306 (48.4) | 317 (50.9) | 100 (55.2) |        |
| Intermediate school               | 3537 (35.5) | 2713 (35.9) | 353 (36.5) | 192 (30.4) | 217 (34.8) | 62 (34.3)  |        |
| Senior high school or higher      | 911 (9.1)   | 730 (9.7)   | 109 (11.3) | 40 (6.3)   | 27 (4.3)   | 5 (2.8)    |        |
| Others                            | 160 (1.6)   | 151 (2.0)   | 5 (0.5)    | 3 (0.5)    | 0 (0)      | 1 (0.6)    |        |
| Employment status                 |             |             |            |            |            |            | <0.001 |
| Retirement                        | 3940 (39.5) | 2564 (33.9) | 768 (79.3) | 387 (61.2) | 186 (29.9) | 35 (19.3)  |        |
| Unemployment                      | 2763 (27.7) | 2181 (28.8) | 74 (7.6)   | 131 (20.7) | 313 (50.2) | 64 (35.4)  |        |
| Temporary employment              | 1162 (11.7) | 995 (13.2)  | 28 (2.9)   | 52 (8.2)   | 60 (9.6)   | 27 (14.9)  |        |
| Long-term employment              | 1170 (11.7) | 1083 (14.3) | 44 (4.5)   | 28 (4.4)   | 8 (1.3)    | 7 (3.9)    |        |
| Others                            | 929 (9.3)   | 737 (9.7)   | 54 (5.6)   | 34 (5.4)   | 56 (9.0)   | 48 (26.5)  |        |
| Annual personal income per capita |             |             |            |            |            |            | <0.001 |
| ≤1000 Yuan                        | 1483 (14.9) | 1175 (15.5) | 35 (3.6)   | 57 (9.0)   | 164 (26.3) | 52 (28.7)  |        |
| 1001-5000 Yuan                    | 1008 (10.1) | 731 (9.7)   | 46 (4.8)   | 65 (10.3)  | 124 (19.9) | 42 (23.2)  |        |
| 5001-30000 Yuan                   | 2988 (30.0) | 2420 (32.0) | 205 (21.2) | 168 (26.6) | 164 (26.3) | 31 (17.1)  |        |
| 30001-40000 Yuan                  | 1603 (16.1) | 1085 (14.4) | 308 (31.8) | 145 (22.9) | 44 (7.1)   | 21 (11.6)  |        |
| >40000 Yuan                       | 2336 (23.4) | 1724 (22.8) | 331 (34.2) | 178 (28.2) | 90 (14.4)  | 13 (7.2)   |        |
| Missing                           | 546 (5.5)   | 425 (5.6)   | 43 (4.4)   | 19 (3.0)   | 37 (5.9)   | 22 (12.2)  |        |
| Annual family income per capita   |             |             |            |            |            |            | <0.001 |
| ≤20000 Yuan                       | 2587 (26.0) | 2091 (27.7) | 83 (8.6)   | 109 (17.2) | 243 (39)   | 61 (33.7)  |        |
| 20001-39000 Yuan                  | 2001 (20.1) | 1493 (19.7) | 179 (18.5) | 129 (20.4) | 142 (22.8) | 58 (32)    |        |
| 39001-60000 Yuan                  | 2817 (28.3) | 2051 (27.1) | 359 (37.1) | 232 (36.7) | 138 (22.2) | 37 (20.4)  |        |
| >60000 Yuan                       | 1751 (17.6) | 1287 (17.0) | 271 (28.0) | 126 (19.9) | 56 (9.0)   | 11 (6.1)   |        |
| Missing                           | 808 (8.1)   | 638 (8.4)   | 76 (7.9)   | 36 (5.7)   | 44 (7.1)   | 14 (7.7)   |        |
| Season for survey                 |             |             |            |            |            |            | <0.001 |
| Spring                            | 1598 (16.0) | 1081 (14.3) | 143 (14.8) | 131 (20.7) | 158 (25.4) | 85 (47)    |        |
| Summer                            | 3545 (35.6) | 2559 (33.8) | 501 (51.8) | 253 (40)   | 216 (34.7) | 16 (8.8)   |        |
| Autumn                            | 2847 (28.6) | 2376 (31.4) | 238 (24.6) | 104 (16.5) | 99 (15.9)  | 30 (16.6)  |        |
| Winter                            | 1974 (19.8) | 1544 (20.4) | 86 (8.9)   | 144 (22.8) | 150 (24.1) | 50 (27.6)  |        |

|                                               |             |             |            |            |            |            |        |
|-----------------------------------------------|-------------|-------------|------------|------------|------------|------------|--------|
| Region of China                               |             |             |            |            |            |            | <0.001 |
| Eastern                                       | 3430 (34.4) | 2748 (36.3) | 345 (35.6) | 218 (34.5) | 112 (18)   | 7 (3.9)    |        |
| Central                                       | 1951 (19.6) | 1661 (22.0) | 60 (6.2)   | 58 (9.2)   | 144 (23.1) | 28 (15.5)  |        |
| Western                                       | 3676 (36.9) | 2767 (36.6) | 160 (16.5) | 285 (45.1) | 321 (51.5) | 143 (79)   |        |
| Northeastern                                  | 907 (9.1)   | 384 (5.1)   | 403 (41.6) | 71 (11.2)  | 46 (7.4)   | 3 (1.7)    |        |
| Source of cases                               |             |             |            |            |            |            | <0.001 |
| Screening cases                               | 965 (9.7)   | 893 (11.8)  | 17 (1.8)   | 18 (2.8)   | 18 (2.9)   | 19 (10.5)  |        |
| Inpatient cases                               | 4408 (44.2) | 3046 (40.3) | 599 (61.9) | 391 (61.9) | 305 (49)   | 67 (37)    |        |
| Outpatient cases                              | 2236 (22.4) | 1807 (23.9) | 229 (23.7) | 97 (15.3)  | 88 (14.1)  | 15 (8.3)   |        |
| Household cases                               | 2355 (23.6) | 1814 (24)   | 123 (12.7) | 126 (19.9) | 212 (34.0) | 80 (44.2)  |        |
| Pulmonary tuberculosis                        |             |             |            |            |            |            | <0.001 |
| No                                            | 9221 (92.5) | 7023 (92.9) | 924 (95.5) | 580 (91.8) | 530 (85.1) | 164 (90.6) |        |
| Yes                                           | 743 (7.5)   | 537 (7.1)   | 44 (4.5)   | 52 (8.2)   | 93 (14.9)  | 17 (9.4)   |        |
| Hypertension                                  |             |             |            |            |            |            | <0.001 |
| No                                            | 7953 (79.8) | 6172 (81.6) | 652 (67.4) | 464 (73.4) | 520 (83.5) | 145 (80.1) |        |
| Yes                                           | 2011 (20.2) | 1388 (18.4) | 316 (32.6) | 168 (26.6) | 103 (16.5) | 36 (19.9)  |        |
| Diabetes                                      |             |             |            |            |            |            | <0.001 |
| No                                            | 9320 (93.5) | 7116 (94.1) | 855 (88.3) | 583 (92.2) | 588 (94.4) | 178 (98.3) |        |
| Yes                                           | 644 (6.5)   | 444 (5.9)   | 113 (11.7) | 49 (7.8)   | 35 (5.6)   | 3 (1.7)    |        |
| Cardiovascular                                |             |             |            |            |            |            | <0.001 |
| No                                            | 8852 (88.8) | 6929 (91.7) | 714 (73.8) | 482 (76.3) | 560 (89.9) | 167 (92.3) |        |
| Yes                                           | 1112 (11.2) | 631 (8.3)   | 254 (26.2) | 150 (23.7) | 63 (10.1)  | 14 (7.7)   |        |
| Accumulated dust exposure time                |             |             |            |            |            |            | <0.001 |
| > 34 years                                    | 681 (6.8)   | 460 (6.1)   | 138 (14.3) | 48 (7.6)   | 27 (4.3)   | 8 (4.4)    |        |
| 30–34 years                                   | 1394 (14.0) | 966 (12.8)  | 225 (23.2) | 98 (15.5)  | 76 (12.2)  | 29 (16.0)  |        |
| 25–29 years                                   | 1208 (12.1) | 892 (11.8)  | 157 (16.2) | 73 (11.6)  | 62 (10.0)  | 24 (13.3)  |        |
| 20–24 years                                   | 1894 (19.0) | 1360 (18)   | 182 (18.8) | 152 (24.1) | 156 (25.0) | 44 (24.3)  |        |
| 15–19 years                                   | 1365 (13.7) | 1054 (13.9) | 95 (9.8)   | 93 (14.7)  | 97 (15.6)  | 26 (14.4)  |        |
| 10–14 years                                   | 1619 (16.2) | 1300 (17.2) | 88 (9.1)   | 93 (14.7)  | 106 (17.0) | 32 (17.7)  |        |
| 5–9 years                                     | 1231 (12.4) | 1060 (14.0) | 47 (4.9)   | 47 (7.4)   | 64 (10.3)  | 13 (7.2)   |        |
| < 5 years                                     | 572 (5.7)   | 468 (6.2)   | 36 (3.7)   | 28 (4.4)   | 35 (5.6)   | 5 (2.8)    |        |
| History of using immune-enhancing drugs       |             |             |            |            |            |            | <0.001 |
| No                                            | 8344 (83.7) | 6642 (87.9) | 707 (73.0) | 458 (72.5) | 400 (64.2) | 137 (75.7) |        |
| Yes                                           | 1620 (16.3) | 918 (12.1)  | 261 (27)   | 174 (27.5) | 223 (35.8) | 44 (24.3)  |        |
| History of hormone therapy for pneumoconiosis |             |             |            |            |            |            | <0.001 |
| No                                            | 9266 (93.0) | 7203 (95.3) | 893 (92.3) | 564 (89.2) | 460 (73.8) | 146 (80.7) |        |
| Yes                                           | 698 (7.0)   | 357 (4.7)   | 75 (7.7)   | 68 (10.8)  | 163 (26.2) | 35 (19.3)  |        |

Data are expressed as number(%) and mean±standard deviation; COPD: Chronic obstructive pulmonary disease; BMI: Body mass index; WRII: Work-related injury insurance; SRH: Self-Rated Health; CWP: Coal workers' pneumoconiosis.

**Supplementary Table 2.** Prevalence and ORs of COPD Associated with Risk Factors and Social Determinants among Pneumoconiosis Patients in 27 Provinces of China, Stratified by Urban and Rural Residence

| Items                                    | Prevalence (%) in patients (95%CI) |                       |                  | OR   | 95%CI     | P      |
|------------------------------------------|------------------------------------|-----------------------|------------------|------|-----------|--------|
|                                          | Living in rural areas              | Living in urban areas | Total            |      |           |        |
| <b>Sex</b>                               |                                    |                       |                  |      |           |        |
| Male                                     | 19.9 (18.9-21.0)                   | 29.3 (27.9-30.7)      | 23.9 (23.1-24.8) | 1.00 | Reference |        |
| Female                                   | 10.3 (5.1-19.8)                    | 38.3 (31.6-45.4)      | 30.9 (25.5-36.8) | 1.42 | 1.08-1.86 | <0.001 |
| P for difference                         | 0.067                              | 0.010                 | 0.013            |      |           |        |
| <b>Birth place</b>                       |                                    |                       |                  |      |           |        |
| Rural areas                              | 19.9 (18.9-21.0)                   | 27.2 (25.6-28.9)      | 22.4 (21.5-23.3) | 1.00 | Reference |        |
| Urban areas                              | 12.2 (5.3-25.5)                    | 34.5 (32.1-37.0)      | 33.9 (31.5-36.3) | 1.78 | 1.58-2.00 | <0.001 |
| P for difference                         | 0.301                              | <0.001                | <0.001           |      |           |        |
| <b>Alcohol intake</b>                    |                                    |                       |                  |      |           |        |
| Non-drinkers                             | 18.3 (16.9-19.7)                   | 32.8 (31.0-34.7)      | 24.9 (23.8-26.1) | 1.00 | Reference |        |
| Current drinkers                         | 10.1 (8.5-12.0)                    | 26.8 (24.0-29.8)      | 17.3 (15.7-19.0) | 0.63 | 0.55-0.72 | <0.001 |
| Former drinkers                          | 30.4 (28.1-32.7)                   | 24.5 (21.9-27.3)      | 28.1 (26.3-29.9) | 1.17 | 1.06-1.31 | 0.003  |
| P for difference                         | <0.001                             | <0.001                | <0.001           |      |           |        |
| <b>Marital status</b>                    |                                    |                       |                  |      |           |        |
| Married                                  | 19.8 (18.7-20.9)                   | 27.7 (26.3-29.1)      | 23.2 (22.3-24.0) | 1.00 | Reference |        |
| Divorced                                 | 15.2 (10.0-22.5)                   | 32.3 (22.0-44.6)      | 20.9 (15.6-27.2) | 0.87 | 0.61-1.25 | 0.458  |
| Widowed                                  | 23.8 (18.1-30.7)                   | 56.8 (51.1-62.2)      | 44.8 (40.4-49.3) | 2.70 | 2.24-3.25 | <0.001 |
| Single                                   | 22.1 (14.6-31.9)                   | 11.1 (3.1-32.8)       | 20.2 (13.6-28.9) | 0.84 | 0.52-1.36 | 0.475  |
| P for difference                         | 0.294                              | <0.001                | <0.001           |      |           |        |
| <b>Education level</b>                   |                                    |                       |                  |      |           |        |
| Illiterate or semiilliterate             | 21.4 (18.4-24.7)                   | 37.9 (33.2-42.8)      | 27.7 (25.0-30.5) | 1.00 | Reference |        |
| Elementary school                        | 21.8 (20.3-23.3)                   | 32.9 (30.5-35.3)      | 25.5 (24.3-26.9) | 0.90 | 0.77-1.04 | 0.160  |
| Intermediate school                      | 18.2 (16.5-20.1)                   | 28.4 (26.3-30.5)      | 23.3 (21.9-24.7) | 0.79 | 0.68-0.93 | 0.004  |
| Senior high school or higher             | 11.2 (7.8-15.7)                    | 23.2 (20.1-26.6)      | 19.9 (17.4-22.6) | 0.65 | 0.52-0.80 | <0.001 |
| Others                                   | 4.0 (1.6-9.8)                      | 8.3 (3.6-18.1)        | 5.6 (3.0-10.3)   | 0.16 | 0.08-0.31 | <0.001 |
| P for trend                              | <0.001                             | <0.001                | <0.001           |      |           |        |
| <b>Employment status</b>                 |                                    |                       |                  |      |           |        |
| Retirement                               | 26.5 (23.9-29.2)                   | 38.1 (36.3-39.9)      | 34.9 (33.5-36.4) | 1.00 | Reference |        |
| Unemployment                             | 21.5 (20.0-23.2)                   | 17.4 (13.6-21.9)      | 21.1 (19.6-22.6) | 0.50 | 0.44-0.56 | <0.001 |
| Temporary employment                     | 14.7 (12.6-17.0)                   | 12.6 (8.4-18.5)       | 14.4 (12.5-16.5) | 0.31 | 0.26-0.37 | <0.001 |
| Long-term employment                     | 4.7 (3.1-7.0)                      | 9.2 (7.3-11.6)        | 7.4 (6.1-9.1)    | 0.15 | 0.12-0.19 | <0.001 |
| Others                                   | 21.1 (18.1-24.4)                   | 19.7 (15.6-24.7)      | 20.7 (18.2-23.4) | 0.49 | 0.41-0.58 | <0.001 |
| P for difference                         | <0.001                             | <0.001                | <0.001           |      |           |        |
| <b>Annual personal income per capita</b> |                                    |                       |                  |      |           |        |
| ≤1000 Yuan                               | 21.3 (19.2-23.6)                   | 15.9 (10.8-22.7)      | 20.8 (18.8-22.9) | 1.00 | Reference |        |
| 1001-5000 Yuan                           | 26.7 (23.9-29.7)                   | 33.3 (25.4-42.3)      | 27.5 (24.8-30.3) | 1.45 | 1.20-1.74 | <0.001 |

|                                 |                  |                  |                  |      |           |        |
|---------------------------------|------------------|------------------|------------------|------|-----------|--------|
| 5001-30000 Yuan                 | 16.7 (15.1-18.4) | 23.6 (21.0-26.3) | 19.0 (17.6-20.5) | 0.90 | 0.77-1.05 | 0.163  |
| 30001-40000 Yuan                | 19.9 (16.5-23.7) | 37.5 (34.7-40.4) | 32.3 (30.1-34.6) | 1.82 | 1.55-2.14 | <0.001 |
| >40000 Yuan                     | 17.1 (14.2-20.5) | 29.0 (27.0-31.2) | 26.2 (24.5-28.0) | 1.35 | 1.16-1.58 | <0.001 |
| Missing                         | 18.7 (15.1-23.0) | 29.9 (23.5-37.3) | 22.2 (18.9-25.8) | 1.09 | 0.86-1.38 | 0.496  |
| <i>P</i> for trend              | 0.001            | 0.002            | <0.001           |      |           |        |
| Annual family income per capita |                  |                  |                  |      |           |        |
| ≤20000 Yuan                     | 19.2 (17.7-20.9) | 18.8 (14.8-23.6) | 19.2 (17.7-20.7) | 1.00 | Reference |        |
| 20001-39000 Yuan                | 23.9 (21.6-26.4) | 27.7 (24.7-31.0) | 25.4 (23.5-27.3) | 1.43 | 1.25-1.65 | <0.001 |
| 39001-60000 Yuan                | 19.0 (16.8-21.4) | 32.5 (30.3-34.8) | 27.2 (25.6-28.9) | 1.57 | 1.38-1.79 | <0.001 |
| >60000 Yuan                     | 18.2 (15.0-21.9) | 29.7 (27.3-32.3) | 26.5 (24.5-28.6) | 1.52 | 1.32-1.76 | <0.001 |
| Missing                         | 15.9 (12.9-19.3) | 29.6 (24.8-35.0) | 21.0 (18.4-24.0) | 1.12 | 0.92-1.37 | 0.244  |
| <i>P</i> for trend              | 0.007            | 0.007            | <0.001           |      |           |        |
| Region of China                 |                  |                  |                  |      |           |        |
| Eastern                         | 12.2 (10.8-13.8) | 28.4 (26.2-30.6) | 19.9 (18.6-21.3) | 1.00 | Reference |        |
| Central                         | 19.6 (17.3-22.2) | 9.7 (8.0-11.8)   | 14.9 (13.4-16.5) | 0.70 | 0.61-0.82 | <0.001 |
| Western                         | 25.3 (23.7-27.0) | 23.2 (20.7-25.9) | 24.7 (23.4-26.1) | 1.32 | 1.18-1.48 | <0.001 |
| Northeastern                    | 15.6 (10.7-22.4) | 65.8 (62.3-69.1) | 57.7 (54.4-60.8) | 5.49 | 4.69-6.42 | <0.001 |
| <i>P</i> for difference         | <0.001           | <0.001           | <0.001           |      |           |        |
| Season for survey               |                  |                  |                  |      |           |        |
| Spring                          | 31.1 (28.3-33.9) | 34.8 (30.9-38.8) | 32.4 (30.1-34.7) | 1.00 | Reference |        |
| Summer                          | 16.1 (14.5-17.9) | 40.7 (38.4-43.0) | 27.8 (26.4-29.3) | 0.81 | 0.71-0.92 | <0.001 |
| Autumn                          | 10.4 (8.9-12.1)  | 22.5 (20.4-24.7) | 16.5 (15.2-18.0) | 0.41 | 0.36-0.48 | <0.001 |
| Winter                          | 26.2 (23.9-28.6) | 12.9 (10.6-15.7) | 21.8 (20.0-23.7) | 0.58 | 0.50-0.68 | <0.001 |
| <i>P</i> for difference         | <0.001           | <0.001           | <0.001           |      |           |        |
| Source of cases                 |                  |                  |                  |      |           |        |
| Screening cases                 | 9.7 (7.2-12.9)   | 5.7 (4.1-8.0)    | 7.5 (6.0-9.3)    | 1.00 | Reference |        |
| Inpatient cases                 | 23.1 (21.3-25.0) | 37.2 (35.3-39.1) | 30.9 (29.6-32.3) | 5.55 | 4.33-7.11 | <0.001 |
| Outpatient cases                | 13.2 (11.4-15.2) | 26.3 (23.7-29.1) | 19.2 (17.6-20.9) | 2.94 | 2.27-3.83 | <0.001 |
| Household cases                 | 22.8 (21.0-24.7) | 23.9 (19.7-28.7) | 23.0 (21.3-24.7) | 3.70 | 2.86-4.79 | <0.001 |
| <i>P</i> for difference         | <0.001           | <0.001           | <0.001           |      |           |        |
| Pulmonary tuberculosis          |                  |                  |                  |      |           |        |
| No                              | 19.6 (18.5-20.7) | 29.2 (27.8-30.6) | 23.8 (23.0-24.7) | 1.00 | Reference |        |
| Yes                             | 22.6 (19.2-26.5) | 38.3 (32.4-44.5) | 27.7 (24.6-31.1) | 1.23 | 1.04-1.45 | 0.017  |
| <i>P</i> for difference         | 0.117            | 0.003            | 0.019            |      |           |        |
| Hypertension                    |                  |                  |                  |      |           |        |
| No                              | 19.0 (17.9-20.2) | 27.4 (25.9-29.0) | 22.4 (21.5-23.3) | 1.00 | Reference |        |
| Yes                             | 24.4 (21.6-27.4) | 35.8 (33.1-38.6) | 31.0 (29.0-33.0) | 1.56 | 1.40-1.73 | <0.001 |
| <i>P</i> for difference         | <0.001           | <0.001           | <0.001           |      |           |        |
| Diabetes                        |                  |                  |                  |      |           |        |
| No                              | 19.8 (18.8-20.9) | 28.9 (27.5-30.4) | 23.6 (22.8-24.5) | 1.00 | Reference |        |
| Yes                             | 20.5 (15.8-26.2) | 36.9 (32.4-41.6) | 31.1 (27.6-34.7) | 1.45 | 1.22-1.73 | <0.001 |

|                                               |                  |                  |                  |      |           |        |
|-----------------------------------------------|------------------|------------------|------------------|------|-----------|--------|
| <i>P</i> for difference                       | 0.854            | 0.001            | <0.001           |      |           |        |
| Cardiovascular                                |                  |                  |                  |      |           |        |
| No                                            | 19.0 (18.0-20.1) | 25.7 (24.3-27.2) | 21.7 (20.9-22.6) | 1.00 | Reference |        |
| Yes                                           | 32.5 (27.7-37.7) | 47.9 (44.4-51.4) | 43.3 (40.4-46.2) | 2.75 | 2.41-3.12 | <0.001 |
| <i>P</i> for difference                       | <0.001           | <0.001           | <0.001           |      |           |        |
| Accumulated dust exposure time                |                  |                  |                  |      |           |        |
| > 34 years                                    | 19.5 (14.5-25.7) | 37.5 (33.3-41.8) | 32.5 (29.0-36.1) | 2.16 | 1.66-2.82 | <0.001 |
| 30–34 years                                   | 25.4 (21.9-29.2) | 34.2 (31.1-37.5) | 30.7 (28.3-33.2) | 1.99 | 1.57-2.54 | <0.001 |
| 25–29 years                                   | 22.3 (18.9-26.2) | 28.8 (25.6-32.3) | 26.2 (23.8-28.7) | 1.59 | 1.24-2.04 | <0.001 |
| 20–24 years                                   | 25.5 (23.0-28.1) | 32.0 (28.8-35.4) | 28.2 (26.2-30.3) | 1.77 | 1.40-2.34 | <0.001 |
| 15–19 years                                   | 19.4 (16.9-22.2) | 28.3 (24.6-32.3) | 22.8 (20.6-25.1) | 1.33 | 1.04-1.70 | 0.025  |
| 10–14 years                                   | 17.3 (15.2-19.7) | 25.0 (21.4-29.0) | 19.7 (17.8-21.7) | 1.10 | 0.86-1.41 | 0.428  |
| 5–9 years                                     | 13.2 (11.1-15.5) | 16.0 (12.4-20.5) | 13.9 (12.1-15.9) | 0.73 | 0.56-0.95 | 0.019  |
| < 5 years                                     | 16.5 (13.1-20.5) | 21.6 (16.3-28.0) | 18.2 (15.2-21.6) | 1.00 | Reference |        |
| <i>P</i> for trend                            | <0.001           | <0.001           | <0.001           |      |           |        |
| History of using immune-enhancing drugs       |                  |                  |                  |      |           |        |
| No                                            | 16.7 (15.6-17.8) | 25.4 (24.0-26.8) | 20.4 (19.5-21.3) | 1.00 | Reference |        |
| Yes                                           | 37.8 (34.6-41.1) | 49.4 (45.9-52.9) | 43.3 (40.9-45.8) | 2.98 | 2.67-3.34 | <0.001 |
| <i>P</i> for difference                       | <0.001           | <0.001           | <0.001           |      |           |        |
| History of hormone therapy for pneumoconiosis |                  |                  |                  |      |           |        |
| No                                            | 17.0 (16.0-18.1) | 28.7 (27.3-30.1) | 22.3 (21.4-23.1) | 1.00 | Reference |        |
| Yes                                           | 47.8 (43.5-52.2) | 51.6 (44.5-58.6) | 48.9 (45.2-52.6) | 3.34 | 2.85-3.90 | <0.001 |
| <i>P</i> for difference                       | <0.001           | <0.001           | <0.001           |      |           |        |

Data are expressed as number(%); COPD: Chronic obstructive pulmonary disease; OR: Odds ratio; CI: Confidence interval.

**Supplementary Table 3. Collinearity Statistics**

| <b>Variables</b>                              | <b>Tolerance</b> | <b>VIF</b> |
|-----------------------------------------------|------------------|------------|
| Residence                                     | 0.545            | 1.835      |
| BMI                                           | 0.930            | 1.076      |
| Sex                                           | 0.891            | 1.123      |
| Age                                           | 0.572            | 1.747      |
| Smoking index                                 | 0.909            | 1.100      |
| Alcohol intake                                | 0.926            | 1.080      |
| Region of China                               | 0.860            | 1.162      |
| Birth place                                   | 0.721            | 1.387      |
| Marital status                                | 0.943            | 1.061      |
| Education level                               | 0.868            | 1.153      |
| Employment status                             | 0.713            | 1.403      |
| Annual personal income per capita             | 0.613            | 1.632      |
| Annual family income per capita               | 0.682            | 1.467      |
| Season for survey                             | 0.904            | 1.106      |
| Source of cases                               | 0.802            | 1.247      |
| WRII                                          | 0.717            | 1.395      |
| SRH                                           | 0.889            | 1.125      |
| Pulmonary bullae or pneumothorax              | 0.899            | 1.112      |
| Pulmonary tuberculosis                        | 0.956            | 1.046      |
| Hypertension                                  | 0.849            | 1.178      |
| Diabetes                                      | 0.922            | 1.084      |
| Cardiovascular                                | 0.843            | 1.186      |
| Type of pneumoconiosis                        | 0.809            | 1.236      |
| Accumulated dust exposure time                | 0.823            | 1.215      |
| History of using immune-enhancing drugs       | 0.924            | 1.082      |
| History of hormone therapy for pneumoconiosis | 0.911            | 1.098      |

BMI: Body mass index; WRII: Work-related injury insurance; SRH: Self-Rated Health;

VIF: variance inflation factor.

**Supplementary Table 4.** Multivariable-adjusted odds ratios (ORs) for COPD-related risk factors among pneumoconiosis patients in 27 provinces of China

| Items                                                | All pneumoconiosis cases |          | Living in rural areas |          | Living in urban areas |          |
|------------------------------------------------------|--------------------------|----------|-----------------------|----------|-----------------------|----------|
|                                                      | OR (95%CI)               | <i>P</i> | OR (95%CI)            | <i>P</i> | OR (95%CI)            | <i>P</i> |
| <b>Source of cases</b>                               |                          |          |                       |          |                       |          |
| Screening cases                                      | 1.00 (Reference)         |          | 1.00 (Reference)      |          | 1.00 (Reference)      |          |
| Inpatient cases                                      | 3.87 (2.92-5.11)         | <0.001   | 2.23 (1.51-3.30)      | <0.001   | 4.50 (2.92-6.92)      | <0.001   |
| Outpatient cases                                     | 2.86 (2.13-3.84)         | <0.001   | 1.75 (1.17-2.62)      | 0.007    | 3.50 (2.22-5.53)      | <0.001   |
| Household cases                                      | 2.99 (2.23-4.02)         | <0.001   | 1.97 (1.34-2.91)      | 0.001    | 3.21 (1.92-5.38)      | <0.001   |
| <b>Season for survey</b>                             |                          |          |                       |          |                       |          |
| Spring                                               | 1.00 (Reference)         |          | 1.00 (Reference)      |          | 1.00 (Reference)      |          |
| Summer                                               | 0.64 (0.55-0.76)         | <0.001   | 0.68 (0.54-0.86)      | 0.001    | 0.91 (0.70-1.17)      | 0.468    |
| Autumn                                               | 0.29 (0.25-0.35)         | <0.001   | 0.31 (0.24-0.41)      | <0.001   | 0.43 (0.33-0.57)      | <0.001   |
| Winter                                               | 0.58 (0.48-0.70)         | <0.001   | 0.78 (0.61-0.98)      | 0.035    | 0.50 (0.35-0.72)      | <0.001   |
| <b>Employment status</b>                             |                          |          |                       |          |                       |          |
| Retirement                                           | 1.00 (Reference)         |          | 1.00 (Reference)      |          | 1.00 (Reference)      |          |
| Unemployment                                         | 0.67 (0.55-0.82)         | <0.001   | 0.63 (0.49-0.80)      | <0.001   | 0.66 (0.42-1.02)      | 0.061    |
| Temporary employment                                 | 0.79 (0.62-1.01)         | 0.056    | 0.70 (0.51-0.94)      | 0.019    | 1.10 (0.62-1.94)      | 0.745    |
| Long-term employment                                 | 0.34 (0.26-0.45)         | <0.001   | 0.25 (0.15-0.42)      | <0.001   | 0.40 (0.28-0.58)      | <0.001   |
| Others                                               | 0.61 (0.48-0.77)         | <0.001   | 0.52 (0.38-0.71)      | <0.001   | 0.87 (0.60-1.28)      | 0.487    |
| <b>Annual personal income per capita</b>             |                          |          |                       |          |                       |          |
| ≤1000 Yuan                                           | 1.00 (Reference)         |          | 1.00 (Reference)      |          | 1.00 (Reference)      |          |
| 1001-5000 Yuan                                       | 1.47 (1.18-1.84)         | <0.001   | 1.38 (1.09-1.75)      | 0.008    | 1.46 (0.70-3.04)      | 0.314    |
| 5001-30000 Yuan                                      | 0.92 (0.75-1.13)         | 0.440    | 1.03 (0.82-1.29)      | 0.812    | 0.59 (0.32-1.07)      | 0.083    |
| 30001-40000 Yuan                                     | 1.13 (0.88-1.46)         | 0.334    | 1.04 (0.72-1.50)      | 0.852    | 0.69 (0.37-1.29)      | 0.251    |
| >40000 Yuan                                          | 1.07 (0.82-1.38)         | 0.633    | 1.47 (1.01-2.15)      | 0.050    | 0.55 (0.29-1.04)      | 0.066    |
| Missing                                              | 1.50 (1.12-2.01)         | 0.007    | 1.20 (0.85-1.69)      | 0.292    | 1.69 (0.81-3.53)      | 0.165    |
| <b>Annual family income per capita</b>               |                          |          |                       |          |                       |          |
| ≤20000 Yuan                                          | 1.00 (Reference)         |          | 1.00 (Reference)      |          | 1.00 (Reference)      |          |
| 20001-39000 Yuan                                     | 1.36 (1.13-1.63)         | <0.001   | 1.36 (1.11-1.68)      | 0.004    | 1.51 (0.98-2.32)      | 0.060    |
| 39001-60000 Yuan                                     | 1.72 (1.42-2.09)         | <0.001   | 1.41 (1.10-1.81)      | 0.006    | 2.21 (1.45-3.39)      | <0.001   |
| >60000 Yuan                                          | 1.88 (1.50-2.35)         | <0.001   | 1.69 (1.19-2.39)      | 0.003    | 2.27 (1.45-3.56)      | <0.001   |
| Missing                                              | 1.05 (0.82-1.36)         | 0.687    | 1.02 (0.75-1.40)      | 0.895    | 0.97 (0.57-1.67)      | 0.920    |
| <b>History of using immune-enhancing drugs</b>       |                          |          |                       |          |                       |          |
| No                                                   | 1.00 (Reference)         |          | 1.00 (Reference)      |          | 1.00 (Reference)      |          |
| Yes                                                  | 2.07 (1.81-2.38)         | <0.001   | 1.79 (1.48-2.17)      | <0.001   | 2.28 (1.84-2.82)      | <0.001   |
| <b>History of hormone therapy for pneumoconiosis</b> |                          |          |                       |          |                       |          |
| No                                                   | 1.00 (Reference)         |          | 1.00 (Reference)      |          | 1.00 (Reference)      |          |
| Yes                                                  | 2.17 (1.78-2.63)         | <0.001   | 2.40 (1.90-3.04)      | <0.001   | 1.74 (1.19-2.53)      | 0.004    |
| Pulmonary tuberculosis                               | 0.69 (0.56-0.85)         | <0.001   | 0.74 (0.57-0.97)      | 0.027    | 0.76 (0.53-1.10)      | 0.144    |

|                                |                  |       |                  |       |                  |       |
|--------------------------------|------------------|-------|------------------|-------|------------------|-------|
| Cardiovascular                 | 1.30 (1.10-1.53) | 0.002 | 1.55 (1.16-2.06) | 0.003 | 1.04 (0.84-1.29) | 0.718 |
| Accumulated dust exposure time |                  |       |                  |       |                  |       |
| < 5 years                      | 1.00 (Reference) |       | 1.00 (Reference) |       | 1.00 (Reference) |       |
| 5–9 years                      | 0.86 (0.63-1.16) | 0.324 | 0.79 (0.54-1.15) | 0.216 | 0.89 (0.51-1.55) | 0.685 |
| 10–14 years                    | 1.16 (0.87-1.54) | 0.305 | 1.07 (0.75-1.52) | 0.724 | 1.26 (0.77-2.08) | 0.356 |
| 15–19 years                    | 1.13 (0.85-1.51) | 0.401 | 1.05 (0.73-1.52) | 0.788 | 1.08 (0.66-1.77) | 0.749 |
| 20–24 years                    | 1.34 (1.02-1.77) | 0.034 | 1.29 (0.91-1.83) | 0.149 | 1.15 (0.72-1.84) | 0.555 |
| 25–29 years                    | 1.02 (0.76-1.37) | 0.893 | 1.06 (0.71-1.58) | 0.767 | 0.91 (0.56-1.47) | 0.705 |
| 30–34 years                    | 1.09 (0.82-1.45) | 0.537 | 1.07 (0.72-1.57) | 0.744 | 0.96 (0.60-1.53) | 0.860 |
| > 34 years                     | 0.81 (0.59-1.11) | 0.194 | 0.63 (0.37-1.05) | 0.075 | 0.79 (0.48-1.29) | 0.349 |

Data are expressed as number(%); COPD: Chronic obstructive pulmonary disease; OR: Odds ratio; CI: Confidence interval.

**Supplementary Table 5.** Baseline characteristics before and after 1:1 propensity score matching

| Covariates               | Before Matching |             |        | After Matching |             |        |
|--------------------------|-----------------|-------------|--------|----------------|-------------|--------|
|                          | No COPD         | COPD        | SMD    | No COPD        | COPD        | SMD    |
| n                        | 7560            | 2404        |        | 2267           | 2267        |        |
| Residence                |                 |             |        |                |             |        |
| Rural areas              | 4504 (59.6)     | 1114 (46.3) | -0.265 | 1134 (50.0)    | 1090 (48.1) | -0.039 |
| Urban areas              | 3056 (40.4)     | 1290 (53.7) | 0.265  | 1133 (50.0)    | 1177 (51.9) | 0.039  |
| Smoking index            |                 |             |        |                |             |        |
| <100                     | 3813 (50.4)     | 1033 (43.0) | -0.151 | 923 (40.7)     | 960 (42.4)  | 0.033  |
| 100–199                  | 752 (10.0)      | 203 (8.4)   | -0.054 | 210 (9.3)      | 198 (8.7)   | -0.019 |
| 200–399                  | 1169 (15.5)     | 407 (16.9)  | 0.039  | 403 (17.8)     | 384 (16.9)  | -0.022 |
| >399                     | 61.02 (9.1)     | 761 (31.7)  | 0.161  | 731 (32.3)     | 725 (32.0)  | -0.006 |
| BMI                      |                 |             |        |                |             |        |
| <18.5                    | 4093 (54.1)     | 1242 (51.7) | -0.050 | 1190 (52.5)    | 1178 (52.0) | -0.011 |
| 18.5-23.9                | 468 (6.2)       | 273 (11.4)  | 0.163  | 242 (10.7)     | 254 (11.2)  | 0.017  |
| 24.0-27.9                | 2412 (31.9)     | 728 (30.3)  | -0.035 | 676 (29.8)     | 682 (30.1)  | 0.006  |
| ≥28.0                    | 587 (7.8)       | 161 (6.7)   | -0.043 | 159 (7.0)      | 153 (6.8)   | -0.011 |
| Stages of pneumoconiosis |                 |             |        |                |             |        |
| Stage I                  | 3493 (46.2)     | 968 (40.3)  | -0.121 | 825 (36.4)     | 899 (39.7)  | 0.067  |
| Stage II                 | 1846 (24.4)     | 632 (26.3)  | 0.043  | 636 (28.1)     | 604 (26.6)  | -0.032 |
| Stage III                | 1482 (19.6)     | 623 (25.9)  | 0.144  | 627 (27.7)     | 586 (25.9)  | -0.041 |
| Clinical cases           | 739 (9.8)       | 181 (7.5)   | -0.085 | 179 (7.9)      | 178 (7.9)   | -0.002 |
| Region of China          |                 |             |        |                |             |        |
| Eastern                  | 2748 (36.4)     | 682 (28.4)  | -0.177 | 699 (30.9)     | 666 (29.4)  | -0.032 |
| Central                  | 1661 (22.0)     | 290 (12.1)  | -0.304 | 235 (10.4)     | 288 (12.7)  | 0.070  |
| Western                  | 2767 (36.6)     | 909 (37.8)  | 0.025  | 968 (42.7)     | 879 (38.8)  | -0.081 |
| Northeastern             | 384 (5.1)       | 523 (21.8)  | 0.404  | 365 (16.1)     | 434 (19.1)  | 0.077  |
| Alcohol intake           |                 |             |        |                |             |        |

| Covariates                       | Before Matching |             |        | After Matching |             |        |
|----------------------------------|-----------------|-------------|--------|----------------|-------------|--------|
|                                  | No COPD         | COPD        | SMD    | No COPD        | COPD        | SMD    |
| Non-drinkers                     | 4049 (53.6)     | 1345 (56.0) | 0.048  | 1240 (54.7)    | 1253 (55.3) | 0.012  |
| Current drinkers                 | 1711 (22.6)     | 357 (14.9)  | -0.219 | 347 (15.3)     | 345 (15.2)  | -0.002 |
| Former drinkers                  | 1800 (23.8)     | 702 (29.2)  | 0.119  | 680 (30.0)     | 669 (29.5)  | -0.011 |
| Pulmonary tuberculosis           |                 |             |        |                |             |        |
| No                               | 7023 (92.9)     | 2198 (91.4) | -0.052 | 2079 (91.7)    | 2072 (91.4) | -0.011 |
| Yes                              | 537 (7.1)       | 206 (8.6)   | 0.052  | 188 (8.3)      | 195 (8.6)   | 0.011  |
| Pulmonary bullae or pneumothorax |                 |             |        |                |             |        |
| No                               | 7079 (93.6)     | 1916 (79.7) | -0.346 | 1907 (84.1)    | 1845 (81.4) | -0.070 |
| Yes                              | 481 (6.4)       | 488 (20.3)  | 0.346  | 360 (15.9)     | 422 (18.6)  | 0.070  |
| Type of pneumoconiosis           |                 |             |        |                |             |        |
| Others                           | 678 (9.0)       | 155 (6.5)   | -0.103 | 137 (6.0)      | 150 (6.6)   | 0.023  |
| Silicosis                        | 3657 (48.4)     | 1103 (45.9) | -0.050 | 1040 (45.9)    | 1022 (45.1) | -0.016 |
| CWP                              | 3225 (42.7)     | 1146 (47.7) | 0.100  | 1090 (48.1)    | 1095 (48.3) | 0.004  |
| WRH                              |                 |             |        |                |             |        |
| No                               | 4150 (54.9)     | 872 (36.3)  | -0.387 | 888 (39.2)     | 863 (38.1)  | -0.023 |
| Yes                              | 3410 (45.1)     | 1532 (63.7) | 0.387  | 1379 (60.8)    | 1404 (61.9) | 0.023  |
| Accumulated dust exposure time   |                 |             |        |                |             |        |
| > 34 years                       | 468 (6.2)       | 104 (4.3)   | -0.092 | 108 (4.8)      | 100 (4.4)   | -0.017 |
| 30–34 years                      | 1060 (14.0)     | 171 (7.1)   | -0.269 | 157 (6.9)      | 170 (7.5)   | 0.022  |
| 25–29 years                      | 1300 (17.2)     | 319 (13.3)  | -0.116 | 326 (14.4)     | 308 (13.6)  | -0.023 |
| 20–24 years                      | 1054 (13.9)     | 311 (12.9)  | -0.030 | 330 (14.6)     | 303 (13.4)  | -0.035 |
| 15–19 years                      | 1360 (18.0)     | 534 (22.2)  | 0.102  | 515 (22.7)     | 506 (22.3)  | -0.010 |
| 10–14 years                      | 892 (11.8)      | 316 (13.1)  | 0.040  | 271 (12.0)     | 299 (13.2)  | 0.037  |
| 5–9 years                        | 966 (12.8)      | 428 (17.8)  | 0.131  | 376 (16.6)     | 392 (17.3)  | 0.019  |

| Covariates | Before Matching |           |       | After Matching |           |       |
|------------|-----------------|-----------|-------|----------------|-----------|-------|
|            | No COPD         | COPD      | SMD   | No COPD        | COPD      | SMD   |
| < 5 years  | 460 (6.1)       | 221 (9.2) | 0.108 | 184 (8.1)      | 189 (8.3) | 0.008 |

Data are expressed as number(%); COPD: Chronic obstructive pulmonary disease; BMI: Body mass index; WRII: Work-related injury insurance; CWP: Coal workers' pneumoconiosis; SMD, standardized mean difference.

## Supplementary Figures

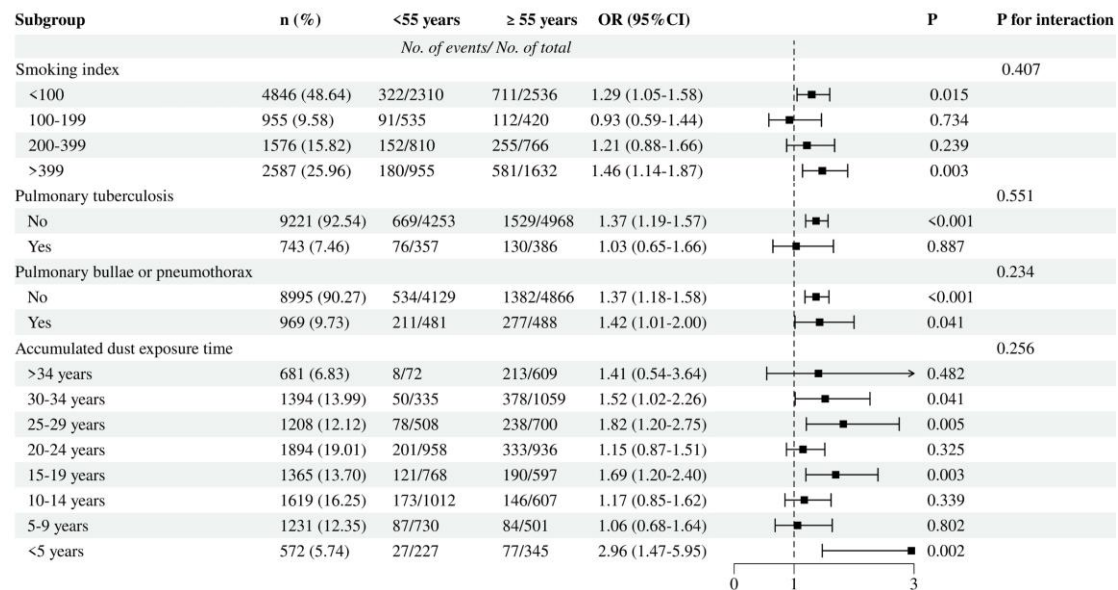

**Supplementary Figure 1.** Subgroup and interaction analyses of the association between age ( $\geq 55$  vs  $< 55$  years) and COPD risk in patients with pneumoconiosis (adjusted for other covariates).

BMI: Body mass index; WRII: Work-related injury insurance; SRH: Self-Rated Health; OR, odds ratio; CI, confidence interval.

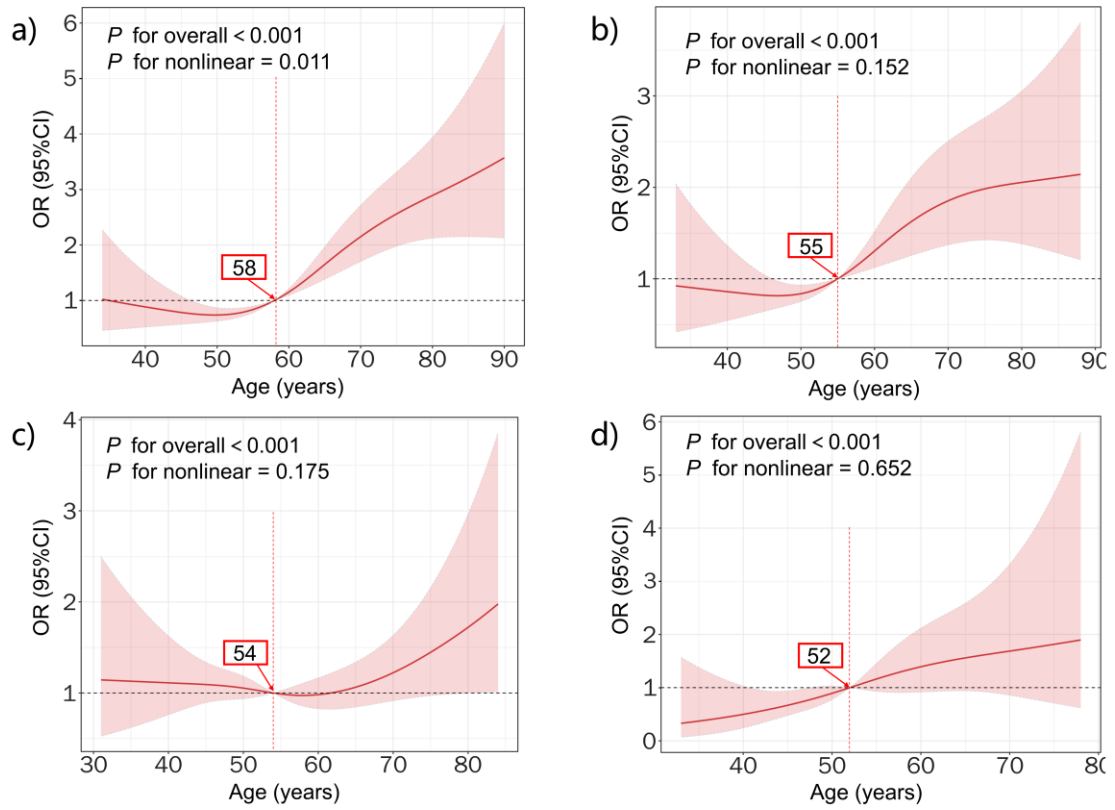

**Supplementary Figure 2.** Stratified analysis of age-related COPD risk by pneumoconiosis stage in patients with pneumoconiosis (fully adjusted model).

Stage I (a), Stage II (b), Stage III (c) and clinical cases (d).

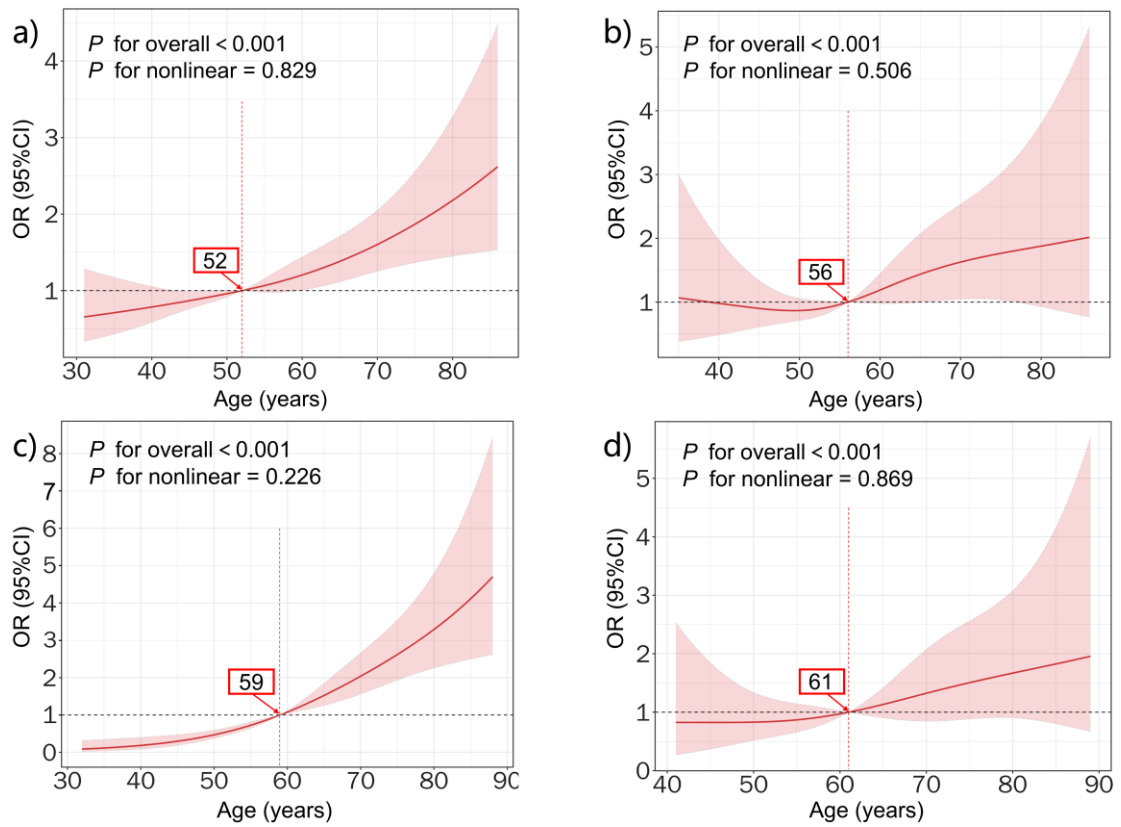

**Supplementary Figure 3.** Stratified analysis of age-related COPD risk by geographic region in patients with pneumoconiosis (fully adjusted model).

Western (a), central (b), eastern (c) and northeastern (d).

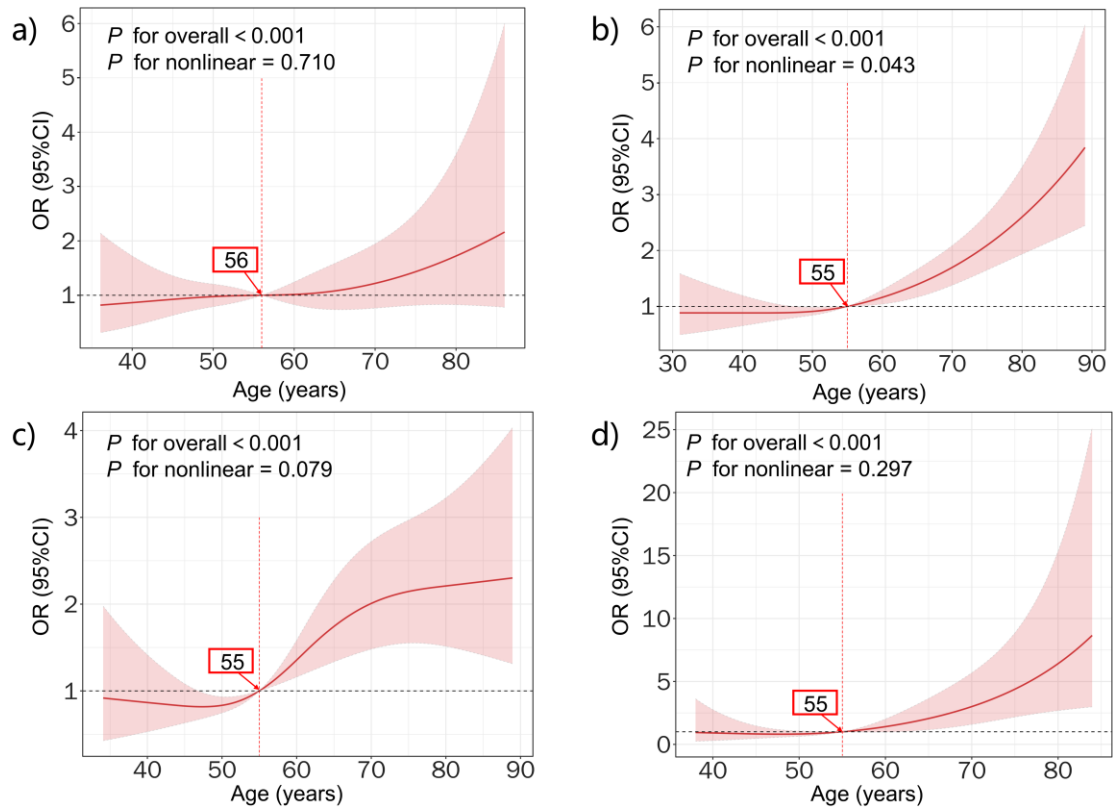

**Supplementary Figure 4.** Stratified analysis of age-related COPD risk by BMI categories in patients with pneumoconiosis (fully adjusted model).

<18.5 kg/m<sup>2</sup> (a), 18.5-23.9 kg/m<sup>2</sup> (b), 24.0-27.9 kg/m<sup>2</sup> (c) and ≥28.0 kg/m<sup>2</sup> (d).

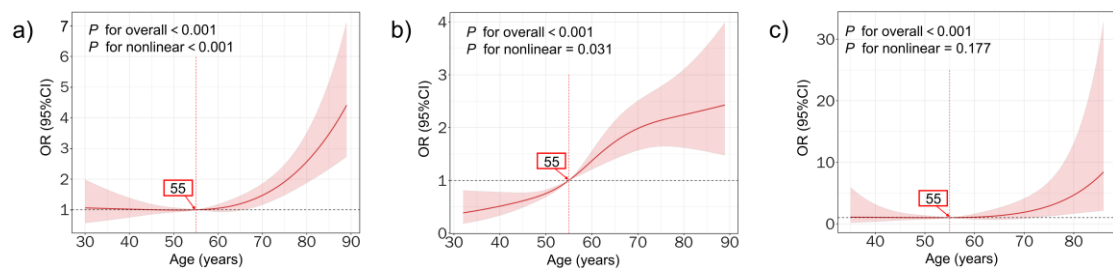

**Supplementary Figure 5.** Stratified analysis of age-related COPD risk by pneumoconiosis subtype in patients with pneumoconiosis (fully adjusted model).

Silicosis (a), coal workers' pneumoconiosis (b) and others (c).

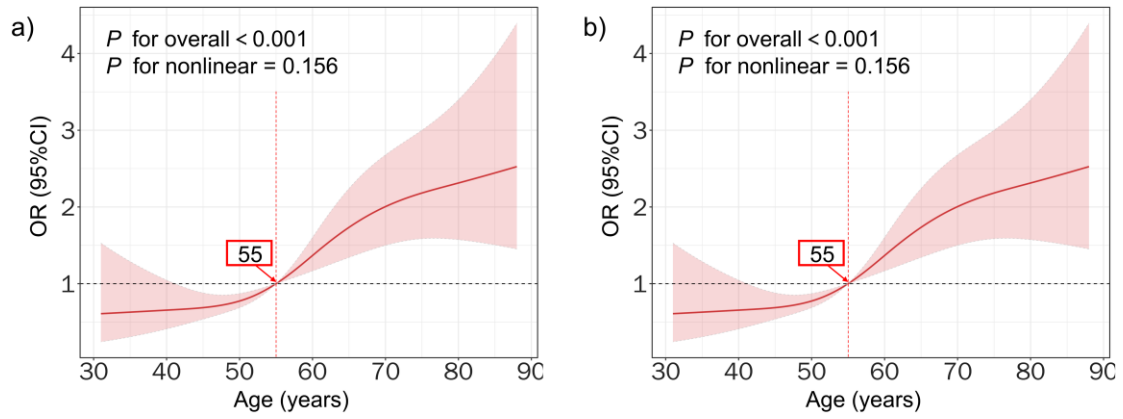

**Supplementary Figure 6.** Stratified analysis of age-related COPD risk by self-rated health (SRH) score in patients with pneumoconiosis (fully adjusted model).

SRH  $\leq$ 60 (a), SRH > 60 (b).

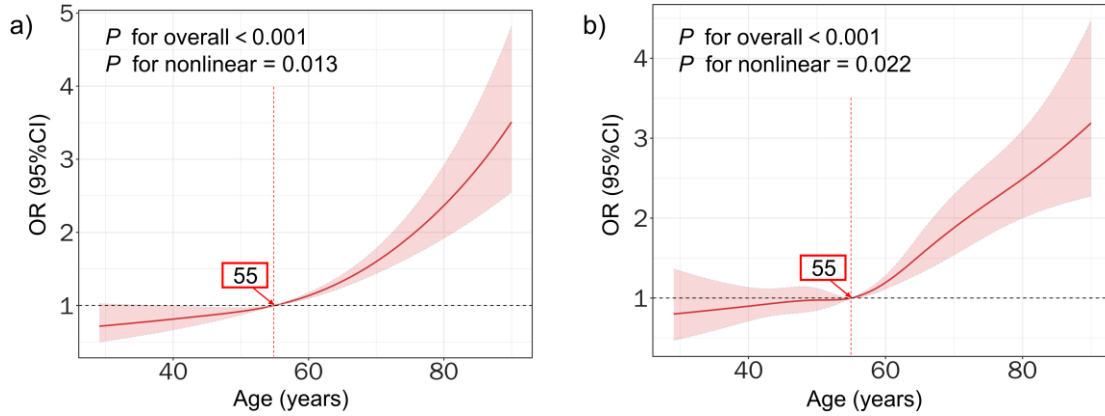

**Supplementary Figure 7.** Sensitivity analysis of age-related COPD risk using restricted cubic spline (RCS) models with different knot settings in patients with pneumoconiosis (fully adjusted model).

RCS model with 3 knots (a), RCS model with 5 knots (b).

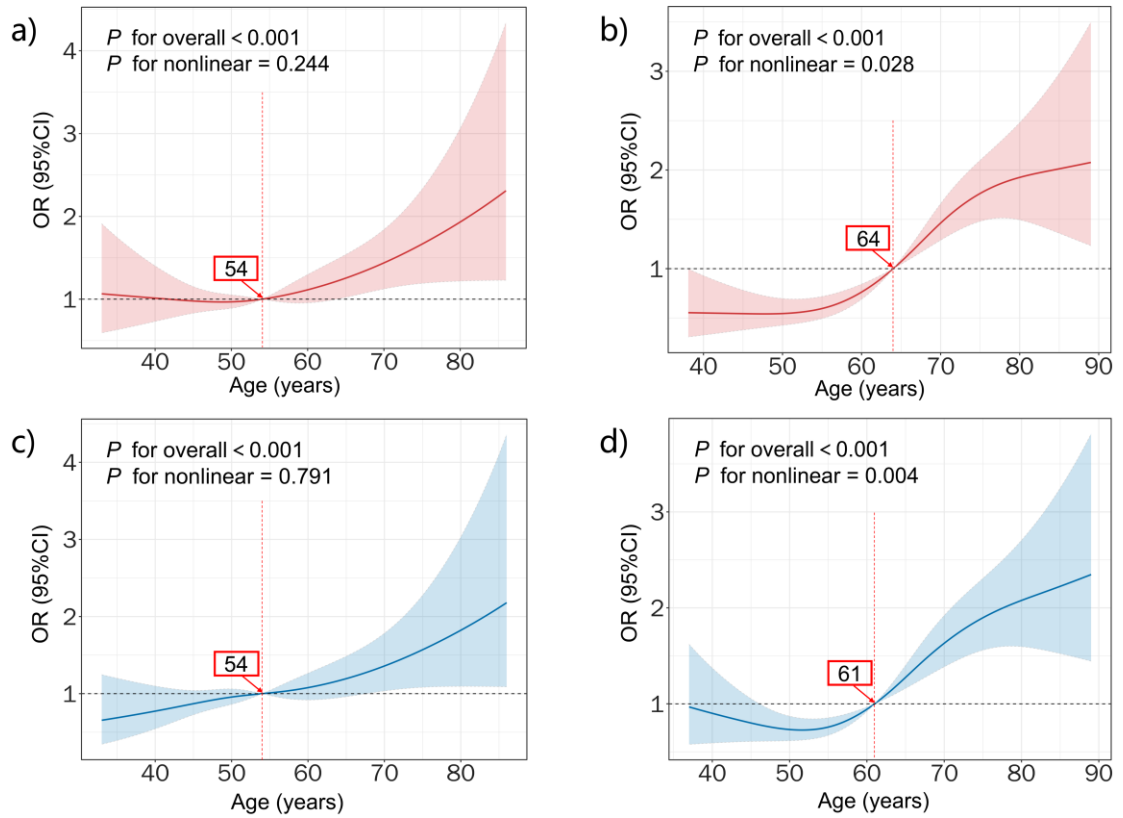

**Supplementary Figure 8.** Stratified analysis of age-related COPD risk by residence and work-related injury insurance(WRII) status in patients with pneumoconiosis after propensity score matching (adjusted for other covariates).

Rural residence (a), urban residence (b), without WRII (c) and with WRII (d). OR, odds ratio; CI, confidence interval.
